# Supplementary material
Source: publisher figshare collection journal article supplement (https://gsapubs.figshare.com/ndownloader/files/31132783)
Supplement: Supplementary file 1 [file 31132783]

## Sheet: Table-S2 Sr-Nd isotopes
Table S2. Sr-Nd isotope date of eclogites from Thongmön (Dingri County) and Riwu (Dinggye County), China.
Sample	Thongmön											Riwu
	DR18-18	DR18-19	DR18-23	DR18-24	DR18-25	DR18-68	DR18-69	DR18-70	DR18-72	DR18-74	DR18-75	RW18-11	RW18-13	RW18-09	RW18-14
Sm	9.26385	9.03941	8.20882	7.61412	9.05974	3.54671	3.9097	3.90201	3.81801	3.67811	3.54141	8.61348	3.64851	3.50803	3.8472
Nd	36.6427	35.5731	32.8817	33.4724	39.7308	14.7049	16.1717	16.173	15.658	15.7108	14.1056	37.9863	13.9826	10.8787	12.4401
147Sm/144Nd	0.152752	0.153533	0.150838	0.137441	0.137776	0.145729	0.146073	0.145775	0.147328	0.141453	0.151694	0.137005	0.157656	0.194836	0.186855
143Nd/144Nd	0.512062	0.512097	0.512061	0.511924	0.511971	0.512376	0.5124	0.512382	0.512393	0.512335	0.512434	0.511953	0.51222	0.51282	0.512818
εNd(t)	-1.08932	-0.584655	-0.664763	-0.240671	0.602707	6.69349	7.08394	6.80049	6.65553	6.88239	6.44584	0.428895	0.868945	3.99906	5.81182
Rb	15.5924	63.7153	9.49428	141.869	62.6633	7.67299	5.15463	4.11898	5.66826	2.7939	5.60288	3.56063	23.3721	3.77427	10.0973
Sr	76.5165	98.5575	100.501	71.3976	150.021	141.391	136.743	132.503	127.873	129.923	121.854	34.1385	119.942	119.37	129.817
87Rb/86Sr	0.589652	1.87065	0.273357	5.74962	1.20864	0.157029	0.109076	0.08995	0.128265	0.0622245	0.133048	0.3018	0.563848	0.0914898	0.225066
87Sr/86Sr	0.836448	0.763705	0.730505	0.854816	0.747979	0.710084	0.714163	0.713685	0.714108	0.713727	0.71119	0.84006	0.7079	0.705552	0.705657
ISr	0.821182	0.715275	0.723428	0.705961	0.716688	0.706019	0.711339	0.711356	0.710787	0.712116	0.707745	0.832247	0.693302	0.703183	0.69983
Note: (1) Isr =87Sr/86Sr-87Rb/86Sr × (eλT-1), λRb =1.42 × 10-11 year-1; (2) εNd(t)={[143Nd/144Nd-147Sm/144Nd × (eλt -1)]/[143Nd/144Nd]CHUR(0)-(147Sm/144Nd)CHUR(0) × (eλt-1)}-1} × 104, λSm=6.54 × 10-12 year-1; (143Nd/144Nd)CHUR(0)=0.512638; (147Sm/144Nd)CHUR(0)=0.1967; (3) t=1850Ma, representing protolith age of eclogite;
